# Supplementary material for: A ternary PdNiMo alloy as a bifunctional nanocatalyst for the oxygen reduction reaction and hydrogen evolution reaction
Source: Royal Society of Chemistry journal article supplement (doi:10.1039/d2qi01317g), 2022-01-01
Supplement: d2qi01317g1.pdf [file d2qi01317g1.pdf]

Supporting Information for:

**Ternary PdNiMo alloy as bifunctional nanocatalysts for oxygen  
reduction reaction and hydrogen evolution reaction**

Xiao Wu,<sup>†</sup> Xiangnan Liu, Yi He,<sup>†</sup> Lecheng Lei,<sup>†,‡</sup> Shaoyun Hao,<sup>\*†</sup> Xingwang  
Zhang,<sup>\*†,‡</sup>

*<sup>†</sup>Key Laboratory of Biomass Chemical Engineering of Ministry of Education, College of  
Chemical and Biological Engineering Zhejiang University, Hangzhou, Zhejiang Province 310027,  
China*

*<sup>‡</sup>Institute of Zhejiang University-Quzhou, 78 Jiuhua Boulevard North, Quzhou 324000, China*

\*E-mail: shaoyunhao@zju.edu.cn; xwzhang@zju.edu.cn

## Contents

|                                                                                                                                                                                                                                    |            |
|------------------------------------------------------------------------------------------------------------------------------------------------------------------------------------------------------------------------------------|------------|
| <b>Experimental section</b> .....                                                                                                                                                                                                  | <b>S4</b>  |
| <b>Table S1</b> The yield of each prepared catalyst.....                                                                                                                                                                           | <b>S10</b> |
| <b>Figure S1</b> TEM, STEM and Elemental mapping of Pd/NC, and Pd <sub>3</sub> Ni/NC.....                                                                                                                                          | <b>S11</b> |
| <b>Figure S2</b> TEM, corresponding size distribution histograms, and HR-TEM images for Pd/NC and Pd <sub>3</sub> Ni/NC.....                                                                                                       | <b>S12</b> |
| <b>Figure S3</b> TEM, STEM, corresponding elemental distribution mapping of Mo <sub>0.2</sub> Pd <sub>3</sub> Ni/NC after the reaction.....                                                                                        | <b>S13</b> |
| <b>Figure S4</b> XRD patterns of all the prepared Pd-based nanocatalysts.....                                                                                                                                                      | <b>S14</b> |
| <b>Figure S5</b> (a) Pd 3 <i>d</i> , (b) Ni 2 <i>p</i> , (c) Mo 3 <i>d</i> , (d) N 1 <i>s</i> XPS spectra of Mo <sub>0.2</sub> Pd <sub>3</sub> Ni/NC before and after the reaction, respectively.....                              | <b>S15</b> |
| <b>Figure S6</b> Raman spectra for Pd/NC, Pd <sub>3</sub> Ni/NC and Mo <sub>0.2</sub> Pd <sub>3</sub> Ni/NC nanocatalysts.....                                                                                                     | <b>S16</b> |
| <b>Table S2</b> ICP-OES analysis for the prepared Pd/NC, Pd <sub>3</sub> Ni/NC, and Mo <sub>0.2</sub> Pd <sub>3</sub> Ni/NC nanocatalysts.....                                                                                     | <b>S17</b> |
| <b>Table S3</b> Binding energy and chemical state of Pd 3 <i>d</i> spectra for Pd/NC, Pd <sub>3</sub> Ni/NC, and Mo <sub>0.2</sub> Pd <sub>3</sub> Ni/NC nanocatalysts.....                                                        | <b>S18</b> |
| <b>Table S4</b> Binding energy and chemical state of Ni 2 <i>p</i> spectra for Pd/NC, Pd <sub>3</sub> Ni/NC, and Mo <sub>0.2</sub> Pd <sub>3</sub> Ni/NC nanocatalysts.....                                                        | <b>S19</b> |
| <b>Figure S7</b> CV, LSV, Tafel and Mass activities for Pd <sub>2</sub> Ni/NC, Pd <sub>4</sub> Ni/NC, Mo <sub>0.1</sub> Pd <sub>3</sub> Ni/NC and Mo <sub>0.3</sub> Pd <sub>3</sub> Ni/NC nanocatalysts in 0.1 M KOH solution..... | <b>S20</b> |
| <b>Figure S8</b> CV curves of Mo <sub>0.2</sub> Pd <sub>3</sub> Ni/NC before and after the reaction.....                                                                                                                           | <b>S21</b> |
| <b>Table S5</b> Onset potential, diffusion limiting current density, and half-wave potentials of all the prepared nanocatalysts and Pt/C.....                                                                                      | <b>S22</b> |
| <b>Table S6</b> Comparison of ORR performances in alkaline media with previous works.....                                                                                                                                          | <b>S23</b> |
| <b>Table S7</b> Mass activities of all prepared nanocatalysts and Pt/C at 0.9 V and 0.85 V.....                                                                                                                                    | <b>S24</b> |

|                                                                                                                                                                                                                                                                                            |            |
|--------------------------------------------------------------------------------------------------------------------------------------------------------------------------------------------------------------------------------------------------------------------------------------------|------------|
| <b>Figure S9</b> LSV curves of Pd/NC, Mo <sub>0.2</sub> Pd <sub>3</sub> Ni/NC, Pt/C in O <sub>2</sub> -saturated 0.1 M KOH solution at a different rotation rate from 400-2250 rpm. Koutecky-Levich (K-L) plots of Pd/NC, Mo <sub>0.2</sub> Pd <sub>3</sub> Ni/NC, Pt/C nanocatalysts..... | <b>S25</b> |
| <b>Figure S10</b> Initial and after 2000 cycles mass activities values of Mo <sub>0.2</sub> Pd <sub>3</sub> Ni/NC.....                                                                                                                                                                     | <b>S26</b> |
| <b>Figure S11</b> ADT measurement for Pt/C, methanol tolerance test for Mo <sub>0.2</sub> Pd <sub>3</sub> Ni/NC and Pt/C in 0.1 M KOH solution.....                                                                                                                                        | <b>S27</b> |
| <b>Figure S12</b> Configurations of adsorbed intermediates on Pd, Pd <sub>3</sub> Ni and Mo <sub>0.2</sub> Pd <sub>3</sub> Ni.....                                                                                                                                                         | <b>S28</b> |
| <b>Figure S13</b> Free energy diagrams of Pd <sub>3</sub> Ni active site-1 and Free energy diagrams of Mo <sub>0.2</sub> Pd <sub>3</sub> Ni active site-1, site 3 and site-4.....                                                                                                          | <b>S29</b> |
| <b>Figure S14</b> LSV curves, Tafel plots, EIS Nyquist plots, C <sub>dl</sub> plots of Pd <sub>2</sub> Ni/NC, Pd <sub>4</sub> Ni/NC, Mo <sub>0.1</sub> Pd <sub>3</sub> Ni/NC, and Mo <sub>0.3</sub> Pd <sub>3</sub> Ni/NC for HER in 0.5 M H <sub>2</sub> SO <sub>4</sub> .....            | <b>S30</b> |
| <b>Figure S15</b> Hydrogen accumulation of Mo <sub>0.2</sub> Pd <sub>3</sub> Ni/NC in 0.5 M H <sub>2</sub> SO <sub>4</sub> .....                                                                                                                                                           | <b>S31</b> |
| <b>Figure S16</b> CV curves for Pd/NC, Pd <sub>3</sub> Ni/NC, Mo <sub>0.2</sub> Pd <sub>3</sub> Ni/NC and Pt/C in 0.5 M H <sub>2</sub> SO <sub>4</sub> .....                                                                                                                               | <b>S32</b> |
| <b>Table S8</b> Comparison of HER performance in acid media from previous reports...                                                                                                                                                                                                       | <b>S33</b> |
| <b>Reference</b> .....                                                                                                                                                                                                                                                                     | <b>S34</b> |

## Experimental section

1

### 2 *Materials*

3 Materials:  $\text{Zn}(\text{NO}_3)_2 \cdot 6\text{H}_2\text{O}$ , Methanol ( $\text{CH}_3\text{OH}$ ), Palladium acetate ( $\text{C}_4\text{H}_6\text{O}_4\text{Pd}$ ) and  
4 Glucose ( $\text{C}_6\text{H}_{12}\text{O}_6$ ) were all directly obtained from Aladdin Reagent (Shanghai) Co., Ltd. 2-  
5 Methylimidazole ( $\text{C}_4\text{H}_6\text{N}_2$ ),  $\text{Ni}(\text{NO}_3)_2 \cdot 6\text{H}_2\text{O}$ , and  $\text{H}_2\text{SO}_4$  were purchased from Sinopharm  
6 Co., Ltd. High purity nitrogen were provided with Hangzhou Metalworking Special Gas Co.,  
7 Ltd. Carbon paper (CP) was supplied with Shanghai Hesens Electric Co., Ltd. All the reagents  
8 applied in this experiment were directly used without any purification. Ultra-pure (18.2 M $\Omega$   
9 cm) water was applied to deal with the prepared electrodes and electrolytes.

### 10 *Characterizations*

11 The surface morphologies were characterized by SU-80 microscope (Hitachi) scanning  
12 electron microscopy (SEM) with a field emission source. Micrographs of transmission  
13 electron microscopy (TEM), High-resolution TEM (HR-TEM) imaging and energy-  
14 dispersive X-ray (EDX) spectroscopy, were obtained by Tecnai G2 F20 S-TWIN (FEI,  
15 America), equipped with an X-ray energy dispersive spectrometer with a field emission  
16 source at 200keV. XRD analysis was performed on the crystal structures of the samples by  
17 Bruker D8 Venture X-ray diffractometer with  $\text{Cu-K}\alpha$  ( $\lambda = 1.54178 \text{ \AA}$ ) as radiation source. X-  
18 ray photoelectron spectroscopy (XPS) was obtained using VG ESCALAB with a  
19 monochrome Al anode (Al  $\text{K}\alpha = 1486.6 \text{ eV}$ ) to examine the surface nanocatalysts. The  
20 multielement content of as-synthesized samples was determined by inductively coupled  
21 plasma (ICP) using the Agilent 7300DV ICP-OES. Raman scattering spectra was performed  
22 on nanocatalysts by ZTJD6-13471HK (Cryo Industries of America, Inc.) with the 514.5 nm

23 line of Ar<sup>+</sup> for excitation.

#### 24 *Electrochemical Measurements*

25 Electrochemical characterizations including cyclic voltammetry (CV), Linear sweep  
26 voltammetry (LSV) and chronopotentiometry were carried out on a CHI 760D  
27 electrochemical instrument using a three-electrode electrochemical system. The platinum  
28 column electrode and Hg/Hg<sub>2</sub>SO<sub>4</sub> full of saturated K<sub>2</sub>SO<sub>4</sub> solution were, respectively,  
29 employed as counter and reference electrodes. Linear sweep voltammetry (LSV) was applied  
30 to characterize the performances of these prepared electrodes in an electrolytic cell containing  
31 0.1 M HClO<sub>4</sub> with bubbling O<sub>2</sub> or N<sub>2</sub> for 30 min at the scan rate of 10 mV s<sup>-1</sup> with the  
32 rotation rates varied from 400 to 2250 rpm. The CV measurements were carried out in O<sub>2</sub>-  
33 saturated 0.1 M HClO<sub>4</sub> solution at the potential scan rate of 100 mV s<sup>-1</sup>.

34 Chronoamperometric (current vs. time (*i-t*) curves) measurements were conducted in an  
35 O<sub>2</sub>-saturated 0.1 M HClO<sub>4</sub> solution at 0.5 V (vs. RHE) for 35,000s. The number of electrons  
36 transferred in ORR can be calculated from the slope of Koutecky-Levich plot, which was  
37 constructed in accordance with the Koutecky-Levich equation. The electron transfer number  
38 during ORR was calculated by Koutecky-Levich equation [1]:

$$39 \quad 1/J = 1/J_K + 1/J_L = nFkC_0 + 1/B\omega^{1/2} \quad (3)$$

$$40 \quad B = nFC_0D^{2/3}\nu^{1/6} \quad (4)$$

41 Where *J* is the measured current density, *J<sub>K</sub>* and *J<sub>L</sub>* are the kinetic and diffusion-limiting  
42 current densities,  $\omega$  is the angular velocity, *n* is transferred electron number, *F* is Faraday  
43 constant (96485 C mol<sup>-1</sup>), *C<sub>0</sub>* is the bulk concentration of O<sub>2</sub> (1.2 × 10<sup>-6</sup> mol cm<sup>-3</sup>), *D<sub>0</sub>* is the  
44 diffusion coefficient of O<sub>2</sub> in 0.1 M HClO<sub>4</sub> (1.93 × 10<sup>-5</sup> cm<sup>2</sup> s<sup>-1</sup>), and  $\nu$  is the kinetic viscosity  
45 of the electrolyte (0.01 cm<sup>2</sup> s<sup>-1</sup>).

46 The electrochemically active surface area (ECSA) was estimated by measuring the charge

47 associated with  $H_{\text{upd}}$  desorption, and the ECSA was calculated based on the following  
48 equation:

$$49 \quad \text{ECSA} = S_H / mvq_H \quad (5)$$

50 Where  $S_H$ ,  $m$ ,  $v$ , and  $q_H$  are the peak area of  $H_{\text{upd}}$  desorption, the weight of the Pd loading,  
51 scan speed, and the charge ( $210 \mu\text{C cm}^{-2}$ ) required for monolayer adsorption of hydrogen on a  
52 Pd surface, respectively.

53 Specific activity (SA) and mass activity (MA) are used to calculate the ORR catalytic  
54 activity of Pd alloy catalyst based on the catalyst kinetic current at 0.9 V vs. RHE.

$$55 \quad \text{SA} = J_K / (\text{ECSA} \times m_{Pd}) \quad (6)$$

$$56 \quad \text{MA} = J_K / (m_{Pd}) \quad (7)$$

57 Where  $J_K$  and  $m_{Pd}$  are the kinetic current density and  $m_{Pd}$  is the Pd loading on the tested  
58 RDE, respectively.

59 In an HER test, catalyst (1.2 mg) and carbon black (1.2 mg) were dispersed in a mixture  
60 containing 2.2 mL ethanol and 0.6 mL Milli-Q water. Subsequently, 0.2 mL 5% Nafion  
61 solution was added into the mixture as a binder and the mixture was ultrasonicated for 1 h,  
62 then the obtained ink (1 mL) was consistently dispensed onto the carbon paper ( $1 \times 1 \text{ cm}$ ) at  
63 room temperature. The Pd loadings for Pd/NC, Pd<sub>2</sub>Ni/NC, Pd<sub>3</sub>Ni/NC, Pd<sub>4</sub>Ni/NC,  
64 Mo<sub>0.1</sub>Pd<sub>3</sub>Ni/NC, Mo<sub>0.2</sub>Pd<sub>3</sub>Ni/NC, Mo<sub>0.3</sub>Pd<sub>3</sub>Ni/NC and Pt/C were  $19.16 \mu\text{g}_{Pd} \text{ cm}^{-2}$ ,  $18.96 \mu\text{g}_{Pd}$   
65  $\text{ cm}^{-2}$ ,  $19.24 \mu\text{g}_{Pd} \text{ cm}^{-2}$ ,  $20.04 \mu\text{g}_{Pd} \text{ cm}^{-2}$ ,  $18.64 \mu\text{g}_{Pd} \text{ cm}^{-2}$ ,  $20.11 \mu\text{g}_{Pd} \text{ cm}^{-2}$ ,  $21.08 \mu\text{g}_{Pd} \text{ cm}^{-2}$ ,  
66 and  $40 \mu\text{g}_{Pt} \text{ cm}^{-2}$ , respectively. LSV was collected in 0.5 M H<sub>2</sub>SO<sub>4</sub> N<sub>2</sub>-saturated solution at  
67 the scan rate of  $10 \text{ mV s}^{-1}$ . Moreover, all the applied potentials were calibrated by a reversible  
68 hydrogen electrode (RHE). The electrochemical impedance was obtained using  
69 electrochemical impedance spectroscopy (EIS) over the frequency domain of 0.01 Hz to  
70 100,000 Hz. The AC potential amplitude applied in EIS measurements was 5 mV.  $R_s$  was  
71 obtained by the equivalent circuit fitting EIS data using ZSimpWin software. All the HER

72 electrochemical tests were in the three-electrode system with a graphite rod and mercurous  
73 sulfate electrode, employed as counter and reference electrodes. Furthermore, the potentials  
74 were  $iR$ -corrected to compensate the effect of uncompensated solution resistance  $R_s$  using the  
75 following equation:

$$76 \quad E_{iR\text{-corrected}} = E_{\text{applied}} - iR_s \quad (8)$$

77 Where  $i$  is current on the electrode.

78 The double-layer capacitance ( $C_{dl}$ ) is calculated from CV measurements by the equation:

$$79 \quad C_{dl} = (J_a - J_c) / (2 \times v) = (|J_a| + |J_c|) / (2 \times v) = \Delta J / (2 \times v) \quad (9)$$

80 Where  $J_a$  and  $J_c$  are the anodic and cathodic current density recorded at the middle of the  
81 selected potential range and  $v$  is the sweep rate.

82 The roughness factor ( $R_f$ ) was calculated by using the equation:

$$83 \quad R_f = C_{dl} / C_s \quad (10)$$

84 The ECSA of the catalysts were estimated from  $C_{dl}$  by the equation:

$$85 \quad \text{ECSA} = A_0 \times C_{dl} / C_s \quad (11)$$

86 Where the  $C_s$ , assumed to  $35 \mu\text{F cm}^{-2}$  based on typical reported value, is the specific  
87 capacitance of the sample or the capacitance of an atomically smooth planar surface of the  
88 material per unit area under identical electrolyte conditions.  $A_0$  is the geometric surface area  
89 of the working electrode.

## 90 **Calculation of Faradaic efficiency**

91 To calculate Faradaic efficiency of  $\text{Mo}_{0.2}\text{Pd}_3\text{Ni}/\text{NC}$  in  $0.5 \text{ M H}_2\text{SO}_4$  solution toward HER,  
92 Test was carried out in a three-electrode configuration and detected by a gas chromatography  
93 (GC, 9790II, Hangzhou Gatai Scientific Instruments). Firstly, electrolyte and cell were  
94 degassed with Ar under stirring for 30 min. Secondly, a constant current of 5 mA was applied  
95 for a period. Using a gas tight syringe to draw gas sample from the head space and the sample

96 was analyzed by a GC calibrated for H<sub>2</sub>. Each gas sample was tested at least three times and  
97 the result of each injection was calculated to obtain the average value.

98 The Faradaic efficiency (*FE*) is calculated based on the following equation:

99 
$$FE = (2 \times V_{H_2} \times F) / (V_m \times I \times t) \times 100\% \quad (12)$$

100  $V_{H_2}$  is the evolved volume of H<sub>2</sub>,  $F$  is the Faraday constant (96485.33289 C/mol),  $V_m$  is the  
101 molar volume of the gas,  $I$  is the current, and  $t$  is the time for electrolysis.

## 102 **Theoretical calculations**

103 ***Density function theory (DFT) calculation details:*** To preliminarily explore the activity  
104 of each catalyst, Vienna Ab Initio Package (VASP) [2, 3] was used to perform all the spin-  
105 polarized density functional theory (DFT) calculations within the generalized gradient  
106 approximation (GGA) using the Perdew-Burke-Ernzerhof (PBE) [4] formulation. We have  
107 chosen the projected augmented wave (PAW) potentials [5, 6] to describe the ionic cores and  
108 take valence electrons into account using a plane wave basis set with a kinetic energy cutoff  
109 of 500eV. Partial occupancies of the Kohn-Sham orbitals were allowed using the Gaussian  
110 smearing method and a width of 0.01 eV. The electronic energy was considered self-  
111 consistent when the energy change was smaller than 10<sup>-5</sup> eV. The maximum Hellmann-  
112 Feynman force for each ionic optimization step is 0.01eV/Å, as well as the optimization of  
113 equilibrium lattice constants. Spin-polarization was considered in all calculations [7].

114 Two configurations of catalysts are established, named Mo-doped, NiPd<sub>3</sub> and Pd. There are  
115 four active site candidates for Mo-doped samples, two possible active sites NiPd<sub>3</sub> for sample  
116 and one catalytic center for Pd sample. A 3×3×1 Gamma k-point grid for Brillouin zone  
117 sampling was used in energy calculation. This slab was separated by a 20 Å vacuum layer in



118 the Z direction between the slab and its periodic images. In order to fully consider the activity  
119 of each catalyst, the possible catalytic sites in catalysts are selected to discuss their adsorption  
120 behavior.

121 The free energy ( $\Delta G$ ) of ORR on those catalysts was defined as

$$122 \quad \Delta G = E_{\text{DFT}} + E_{\text{ZPE}} - T \times S \quad (13)$$

123 where  $E_{\text{DFT}}$ ,  $E_{\text{ZPE}}$ ,  $T$  and  $S$  are the calculation total energy of  $^*\text{O}$ ,  $^*\text{OH}$ , and  $^*\text{OOH}$   
124 intermediate on catalysts surface, the zero-point energy, temperature, and entropy.

125 The overpotential ( $\eta^{\text{ORR}}$ ) of ORR was defined as:

$$126 \quad \eta^{\text{ORR}} = \max\{\Delta G1, \Delta G2, \Delta G3, \Delta G4\}/e + 1.23 \quad (14)$$

127 where the  $\Delta G1$ ,  $\Delta G2$ ,  $\Delta G3$ ,  $\Delta G4$  are the free energy for four elementary reactions of ORR.

**Table S1.** The yield of each prepared catalyst

| Name                                    | yield  |
|-----------------------------------------|--------|
| Pd/NC                                   | 84.12% |
| Pd <sub>2</sub> Ni/NC                   | 84.53% |
| Pd <sub>3</sub> Ni/NC                   | 85.66% |
| Pd <sub>4</sub> Ni/NC                   | 84.27% |
| Mo <sub>0.1</sub> Pd <sub>3</sub> Ni/NC | 85.83% |
| Mo <sub>0.2</sub> Pd <sub>3</sub> Ni/NC | 82.58% |
| Mo <sub>0.3</sub> Pd <sub>3</sub> Ni/NC | 83.47% |

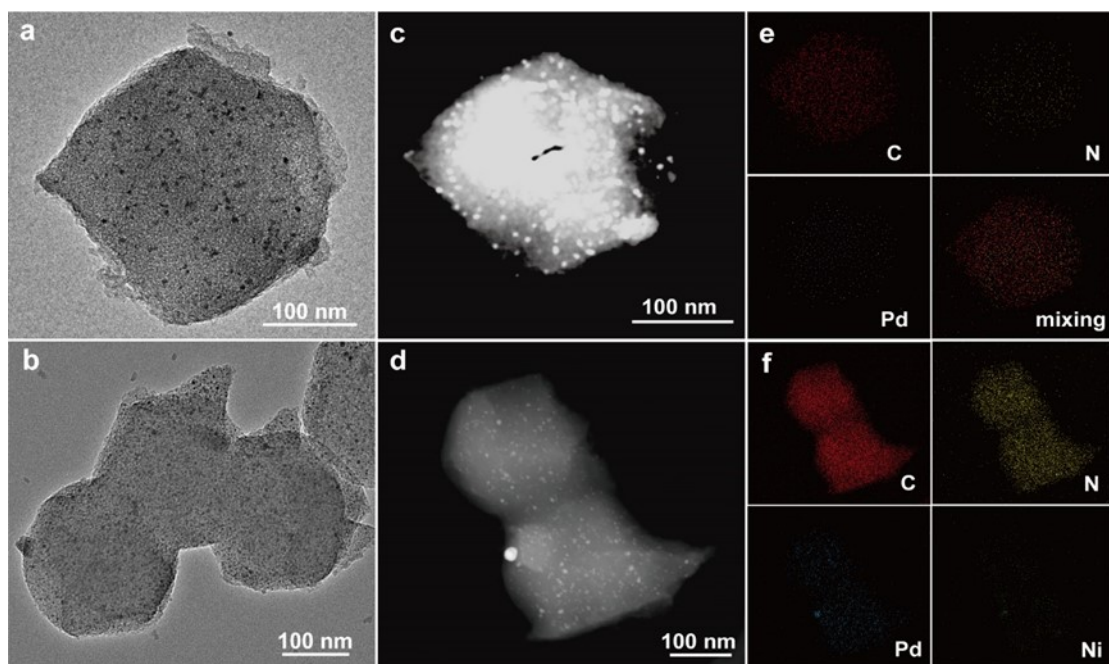

131

132 **Figure S1.** (a-b) TEM images, (c-d) STEM images, (e-f) corresponding elemental  
 133 distribution mapping of Pd/NC, and Pd<sub>3</sub>Ni/NC.

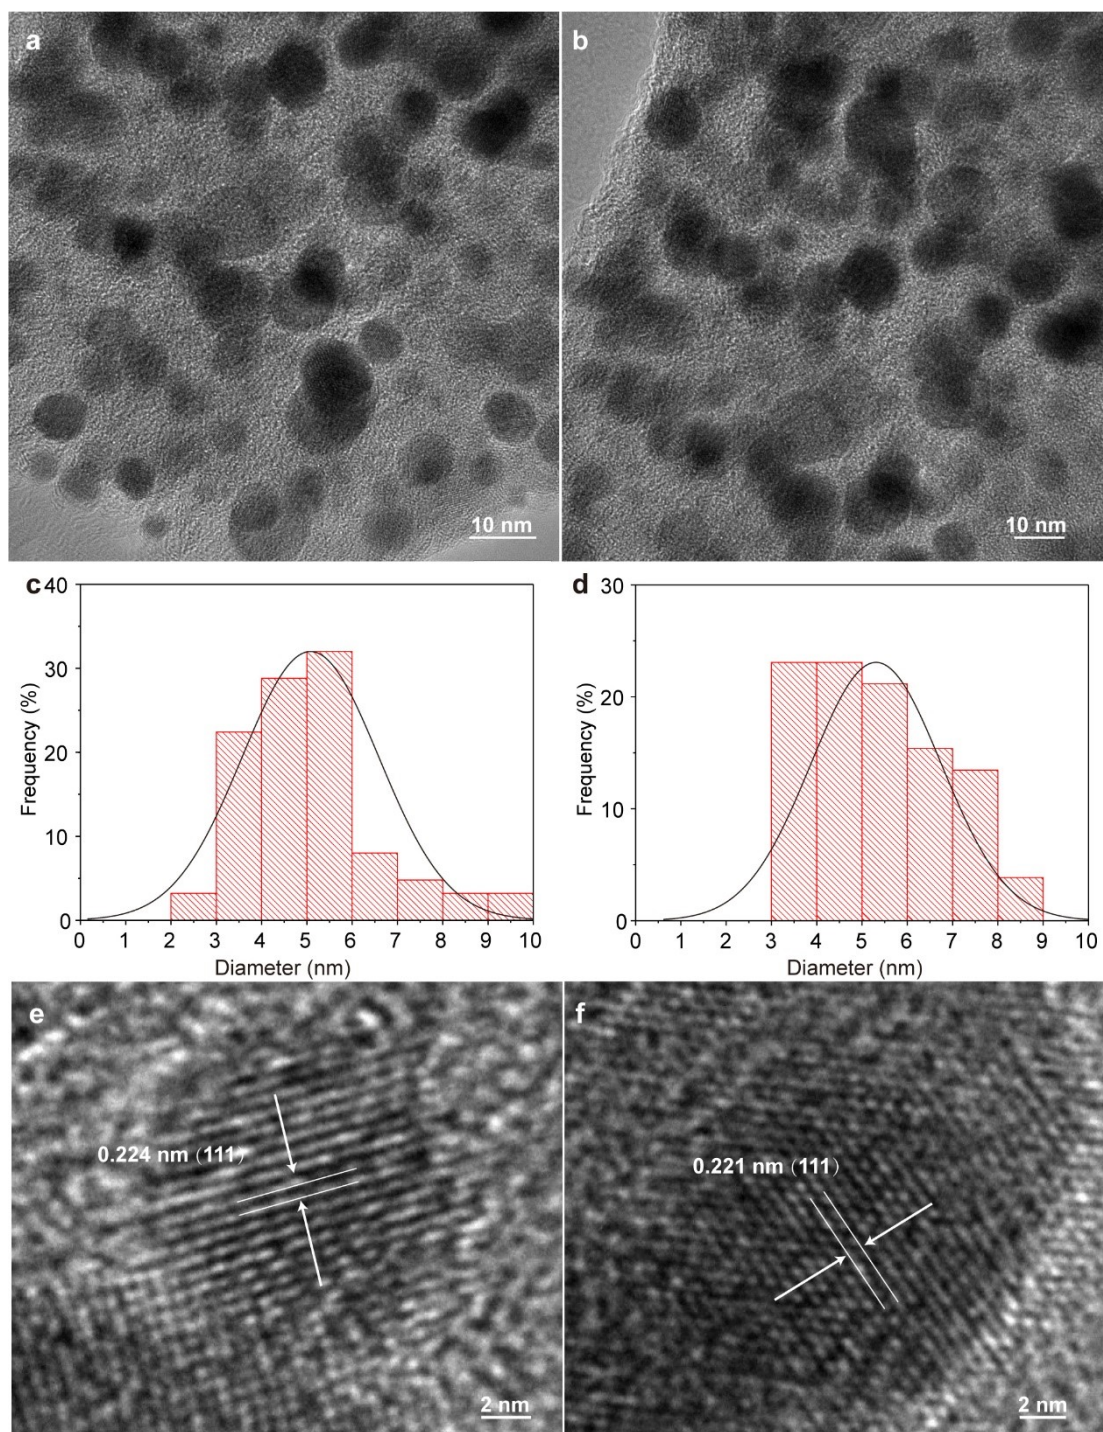

135

136 **Figure S2.** (a-b) TEM images, (c-d) corresponding size distribution histograms, (e-f) HR-

137 TEM images of Pd/NC, and Pd<sub>3</sub>Ni/NC.

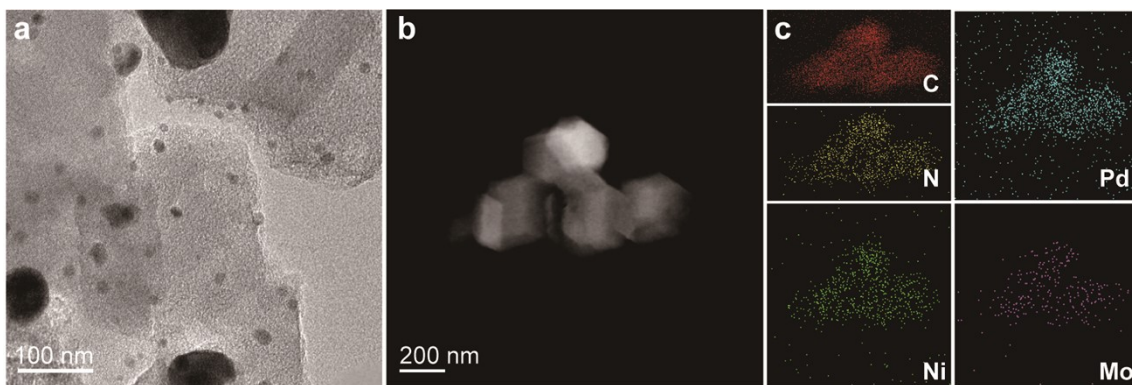

138

139 **Figure S3** (a) TEM image, (b) STEM image, (c) corresponding elemental distribution  
140 mapping of Mo<sub>0.2</sub>Pd<sub>3</sub>Ni/NC after the reaction.

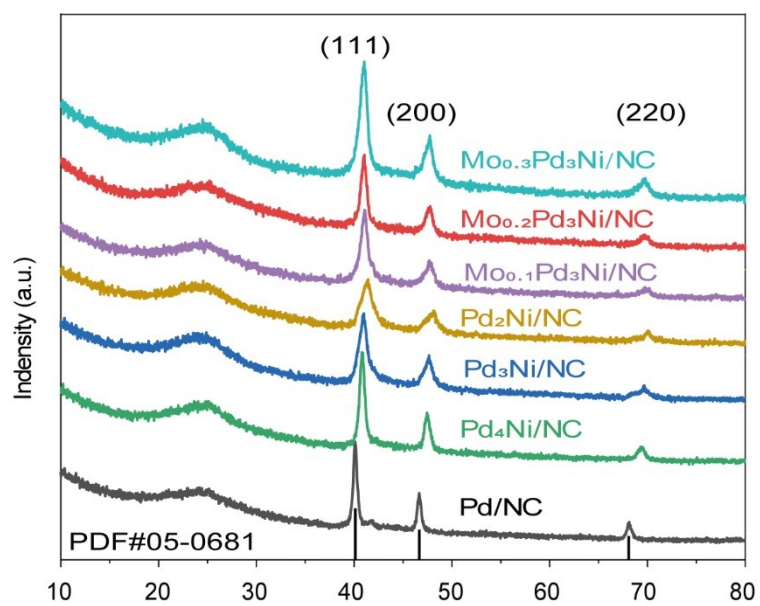

142

143 **Figure S4.** The XRD patterns of all the prepared Pd-based nanocatalysts.



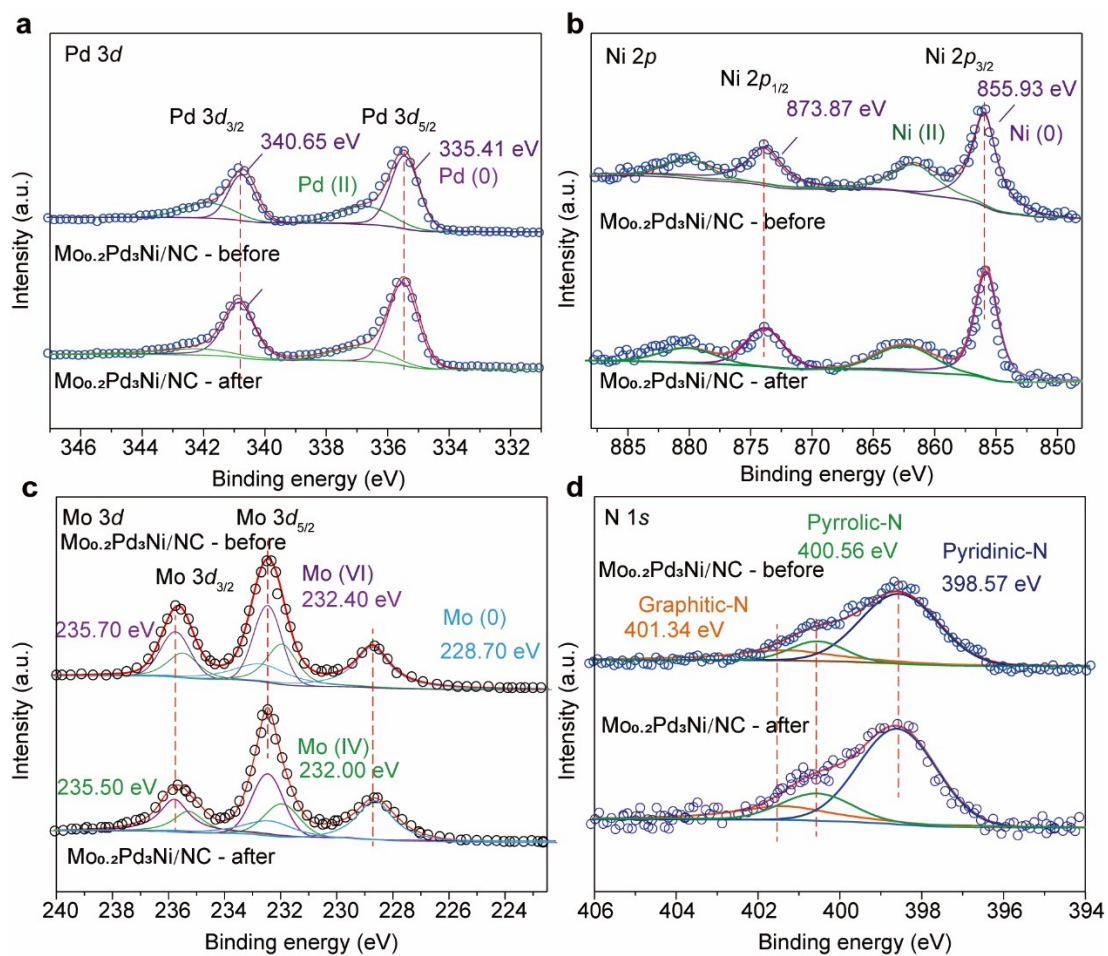

145

146 **Figure S5.** (a) Pd 3d, (b) Ni 2p, (c) Mo 3d, (d) N 1s XPS spectra of Mo<sub>0.2</sub>Pd<sub>3</sub>Ni/NC before  
 147 and after the reaction, respectively.

148

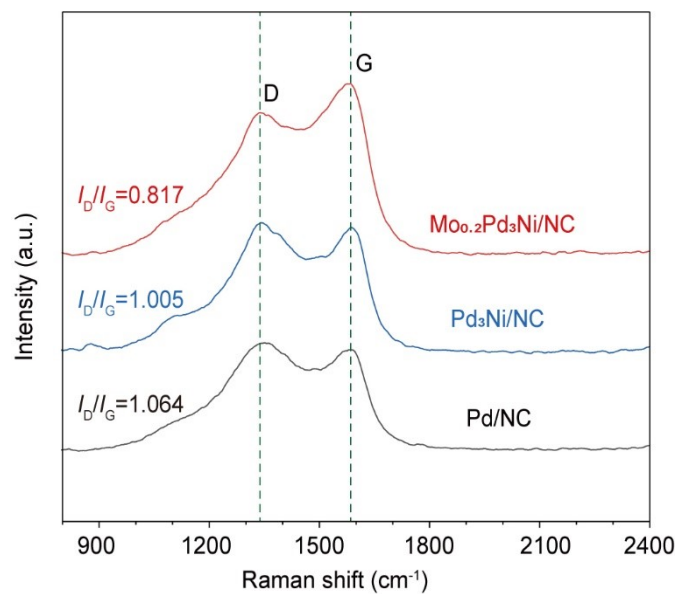

150

151 **Figure S6.** Raman spectra for Pd/NC, Pd<sub>3</sub>Ni/NC, and Mo<sub>0.2</sub>Pd<sub>3</sub>Ni/NC nanocatalysts.



153

**Table S2** ICP-OES analysis of the prepared Pd/NC, Pd<sub>3</sub>Ni/NC and Mo<sub>0.2</sub>Pd<sub>3</sub>Ni/NC

154

nanocatalysts

| Catalysts                               | Element | Sample amount | Element Content | wt.%  |
|-----------------------------------------|---------|---------------|-----------------|-------|
| Pd/NC                                   | Pd      | 15.0 mg       | 100051.2 mg/kg  | 10.01 |
| Pd <sub>3</sub> Ni/NC                   | Pd      | 15.0 mg       | 100259.5 mg/kg  | 10.03 |
|                                         | Ni      | 15.0 mg       | 18576.3 mg/kg   | 1.86  |
|                                         | Pd      | 15.0 mg       | 99835.5 mg/kg   | 9.98  |
| Mo <sub>0.2</sub> Pd <sub>3</sub> Ni/NC | Ni      | 15.0 mg       | 18435.2 mg/kg   | 1.84  |
|                                         | Mo      | 15.0 mg       | 6067.9 mg/kg    | 0.61  |

156 **Table S3** Binding energy and chemical state of Pd 3d spectra for Pd/NC, Pd<sub>3</sub>Ni/NC, and

157

Mo<sub>0.2</sub>Pd<sub>3</sub>Ni/NC nanocatalysts

| Catalysts                               | Binding energy Pd      | Binding energy Pd      | Chemical state |
|-----------------------------------------|------------------------|------------------------|----------------|
|                                         | 3d <sub>5/2</sub> (eV) | 3d <sub>3/2</sub> (eV) |                |
| Pd/NC                                   | 335.57                 | 340.84                 | Pd (0)         |
|                                         | 337.00                 | 342.12                 | Pd (II)        |
| Pd <sub>3</sub> Ni/NC                   | 335.48                 | 340.80                 | Pd (0)         |
|                                         | 336.93                 | 342.05                 | Pd (II)        |
| Mo <sub>0.2</sub> Pd <sub>3</sub> Ni/NC | 335.41                 | 340.65                 | Pd (0)         |
|                                         | 336.72                 | 341.81                 | Pd (II)        |

158

160  
161

**Table S4** Binding energy and chemical state of Ni 2*p* spectra for Pd<sub>3</sub>Ni/NC, and Mo<sub>0.2</sub>Pd<sub>3</sub>Ni/NC

| Catalysts                               | Binding energy Ni              | Binding energy Ni              | Chemical state |
|-----------------------------------------|--------------------------------|--------------------------------|----------------|
|                                         | 2 <i>p</i> <sub>3/2</sub> (eV) | 2 <i>p</i> <sub>1/2</sub> (eV) |                |
| Pd <sub>3</sub> Ni/NC                   | 855.40                         | 873.04                         | Ni (0)         |
|                                         | 863.22                         | 881.24                         | Ni (II)        |
| Mo <sub>0.2</sub> Pd <sub>3</sub> Ni/NC | 855.93                         | 873.87                         | Ni (0)         |
|                                         | 862.69                         | 880.71                         | Ni (II)        |

162

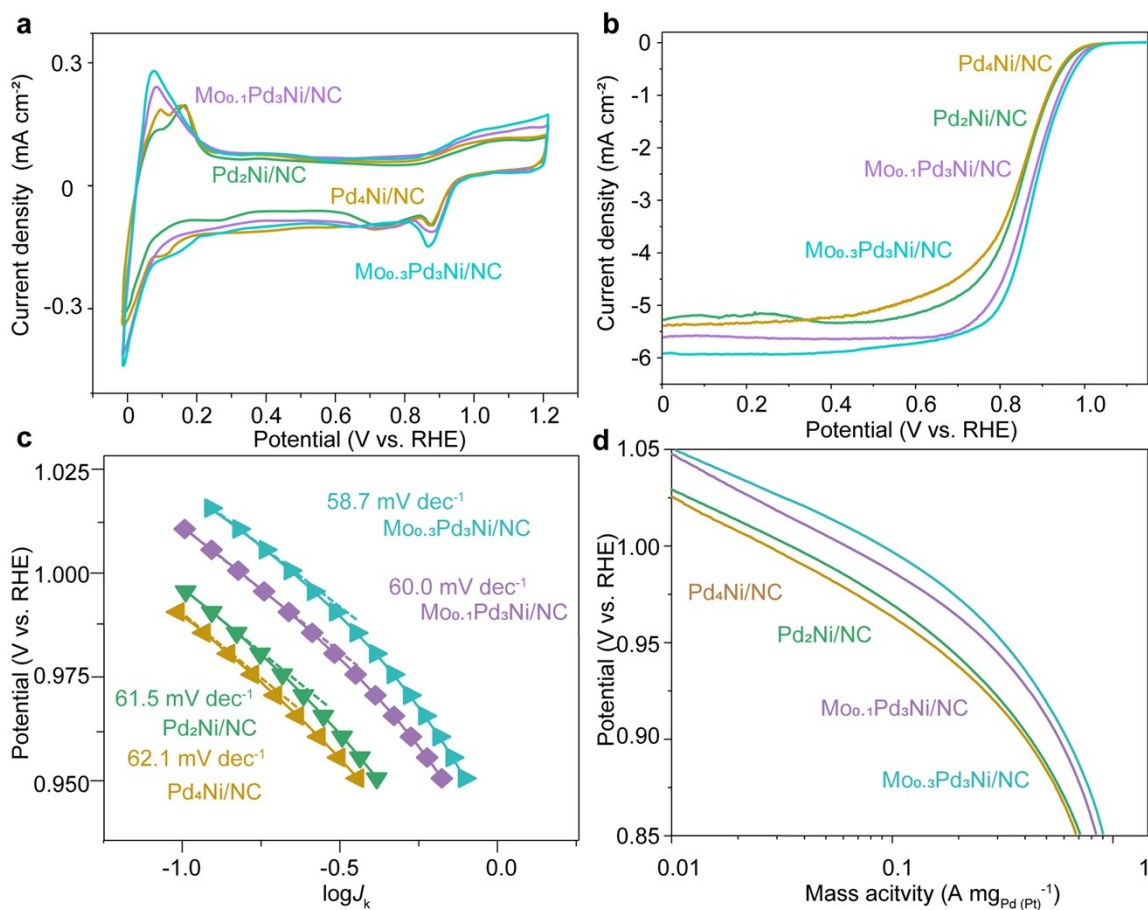

164

165 **Figure S7.** (a) CV curves, (b) LSV curves, (c) Tafel plots, and (d) Mass activity of  
 166 Pd<sub>2</sub>Ni/NC, Pd<sub>4</sub>Ni/NC, Mo<sub>0.1</sub>Pd<sub>3</sub>Ni/NC, and Mo<sub>0.3</sub>Pd<sub>3</sub>Ni/NC nanocatalysts in 0.1 M KOH  
 167 solution.

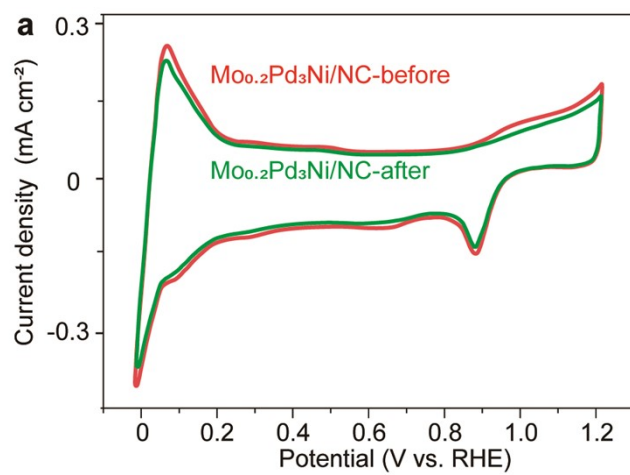

169

170 **Figure S8.** CV curves of Mo<sub>0.2</sub>Pd<sub>3</sub>Ni/NC before and after the reaction, respectively.

172 **Table S5** Onset potential, diffusion limiting current density, and half-wave potential of all the

173

prepared nanocatalysts and Pt/C

| Catalysts                               | $E_{\text{onset}}$ (V vs. RHE) | Current density<br>(mA cm <sup>-2</sup> ) | $E_{1/2}$ (V vs. RHE) |
|-----------------------------------------|--------------------------------|-------------------------------------------|-----------------------|
| Pd/NC                                   | 0.92                           | 4.92                                      | 0.82                  |
| Pd <sub>4</sub> Ni/NC                   | 0.94                           | 5.38                                      | 0.84                  |
| Pd <sub>3</sub> Ni/NC                   | 0.96                           | 5.53                                      | 0.87                  |
| Pd <sub>2</sub> Ni/NC                   | 0.95                           | 5.23                                      | 0.85                  |
| Mo <sub>0.1</sub> Pd <sub>3</sub> Ni/NC | 0.97                           | 5.59                                      | 0.87                  |
| Mo <sub>0.2</sub> Pd <sub>3</sub> Ni/NC | 0.99                           | 5.89                                      | 0.90                  |
| Mo <sub>0.3</sub> Pd <sub>3</sub> Ni/NC | 0.97                           | 5.92                                      | 0.88                  |
| Pt/C                                    | 1.01                           | 5.82                                      | 0.90                  |

**Table S6** Comparison of ORR performances in alkaline media with previous works

| Catalysts                                                                | $E_{\text{onset}}$ (V vs. RHE) | $E_{1/2}$ (V vs. RHE) | MA (A mg <sub>Pd</sub> <sup>-1</sup> ) (0.9 V) | Reference                                                   |
|--------------------------------------------------------------------------|--------------------------------|-----------------------|------------------------------------------------|-------------------------------------------------------------|
| Mo <sub>0.2</sub> Pd <sub>3</sub> Ni/NC                                  | 0.99                           | 0.90                  | 0.78                                           | This work                                                   |
| PdNi nanocorals                                                          | 0.949                          | 0.851                 | 0.006 A                                        | <i>Part. Part. Syst. Char.</i> , <b>2018</b> , 35: 1700366. |
| Dealloyed PdNi/C                                                         | /                              | 0.87                  | 0.37 (0.85 V)                                  | <i>ACS Catal.</i> , <b>2020</b> , 10: 5891.                 |
| Pd <sub>50</sub> Cu <sub>50</sub> film                                   | /                              | 0.886                 | 0.13                                           | <i>J. Am. Chem. Soc.</i> , <b>2020</b> , 142: 3980.         |
| Ordered PdCuCo                                                           | /                              | 0.872                 | 0.13                                           | <i>Angew. Chem., Int. Ed.</i> , <b>2016</b> , 55: 9030.     |
| Dendritic defect-rich Pd <sub>59</sub> Cu <sub>30</sub> Co <sub>11</sub> | /                              | 0.91                  | 0.38                                           | <i>Nat. Commun.</i> , <b>2018</b> , 9: 3702.                |
| PdCoNi/NCNTs                                                             | 0.970                          | 0.907                 | 0.252                                          | <i>Chem. Eng.J.</i> , <b>2021</b> , 411: 128527.            |
| PdMo bimetallic/C                                                        | /                              | 0.95                  | 16.37                                          | <i>Nature</i> , <b>2019</b> , 574: 81.                      |

**Table S7** Mass activities of all the prepared nanocatalysts and Pt/C at 0.9 V and 0.85 V

| Catalysts                               | Mass activity (0.9 V) (A mg <sub>Pd</sub> <sup>-1</sup> ) | Mass activity (0.85 V) (A mg <sub>Pd</sub> <sup>-1</sup> ) |
|-----------------------------------------|-----------------------------------------------------------|------------------------------------------------------------|
| Pd/NC                                   | 0.29                                                      | 0.55                                                       |
| Pd <sub>4</sub> Ni/NC                   | 0.40                                                      | 0.68                                                       |
| Pd <sub>3</sub> Ni/NC                   | 0.52                                                      | 0.82                                                       |
| Pd <sub>2</sub> Ni/NC                   | 0.42                                                      | 0.71                                                       |
| Mo <sub>0.1</sub> Pd <sub>3</sub> Ni/NC | 0.57                                                      | 0.84                                                       |
| Mo <sub>0.2</sub> Pd <sub>3</sub> Ni/NC | 0.78                                                      | 1.01                                                       |
| Mo <sub>0.3</sub> Pd <sub>3</sub> Ni/NC | 0.62                                                      | 0.90                                                       |
| Pt/C                                    | 0.38 (A mg <sub>Pt</sub> <sup>-1</sup> )                  | 0.49 (A mg <sub>Pt</sub> <sup>-1</sup> )                   |



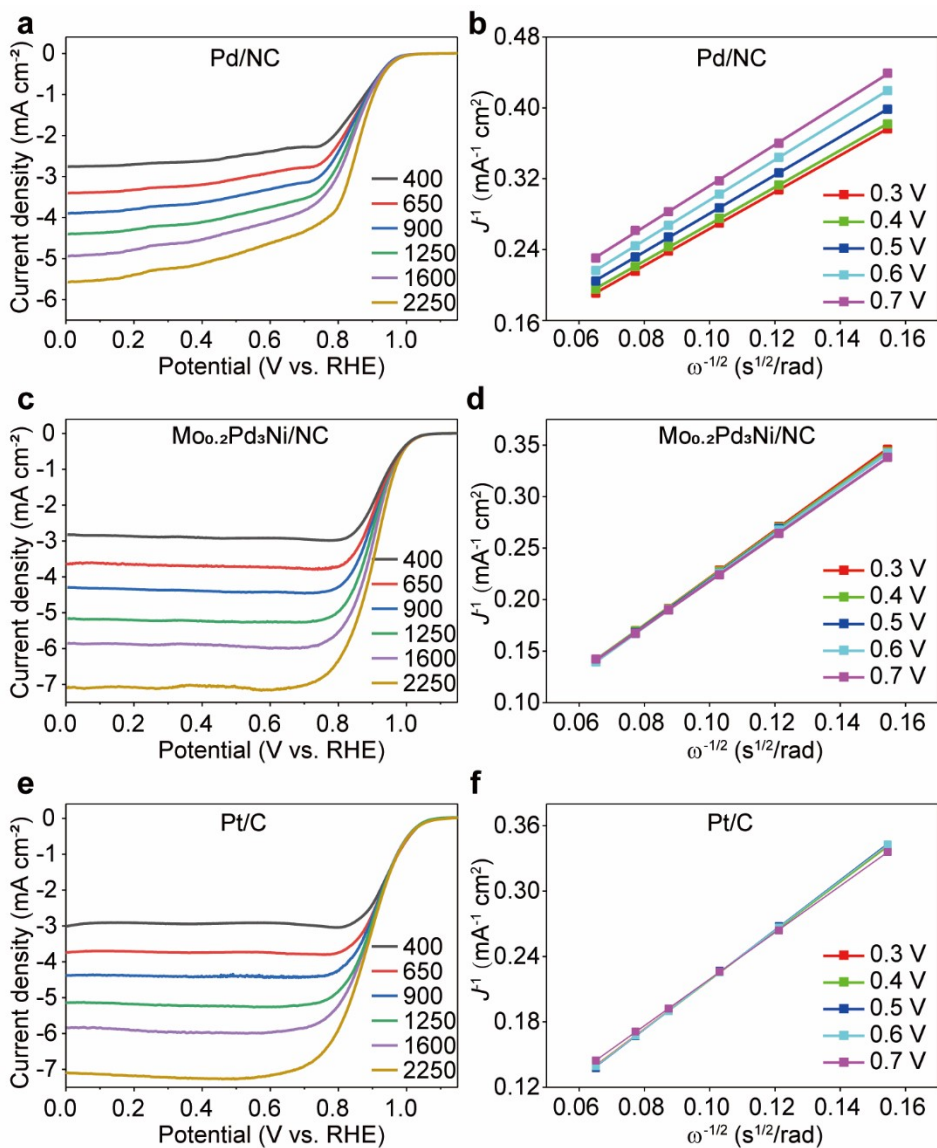

180

181 **Figure S9.** LSV curves of (a) Pd/NC, (c) Mo<sub>0.2</sub>Pd<sub>3</sub>Ni/NC, (e) Pt/C in O<sub>2</sub>-saturated 0.1 M

182 KOH solution at a different rotation rate from 400-2250 rpm. Koutecky-Levich (K-L) plots of

183 (b) Pd/NC, (d) Mo<sub>0.2</sub>Pd<sub>3</sub>Ni/NC, (f) Pt/C.

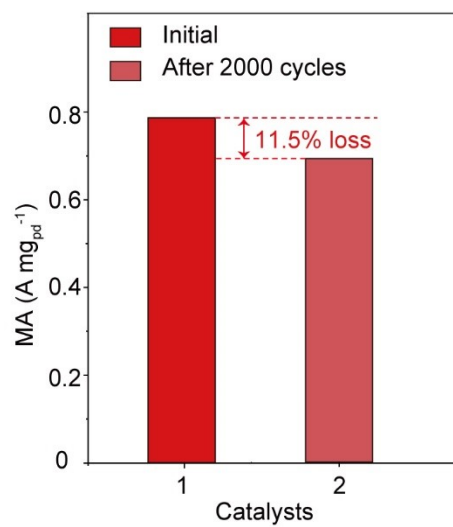

185

186 **Figure S10.** Initial and after 2000 cycles mass activities values of Mo<sub>0.2</sub>Pd<sub>3</sub>Ni/NC.

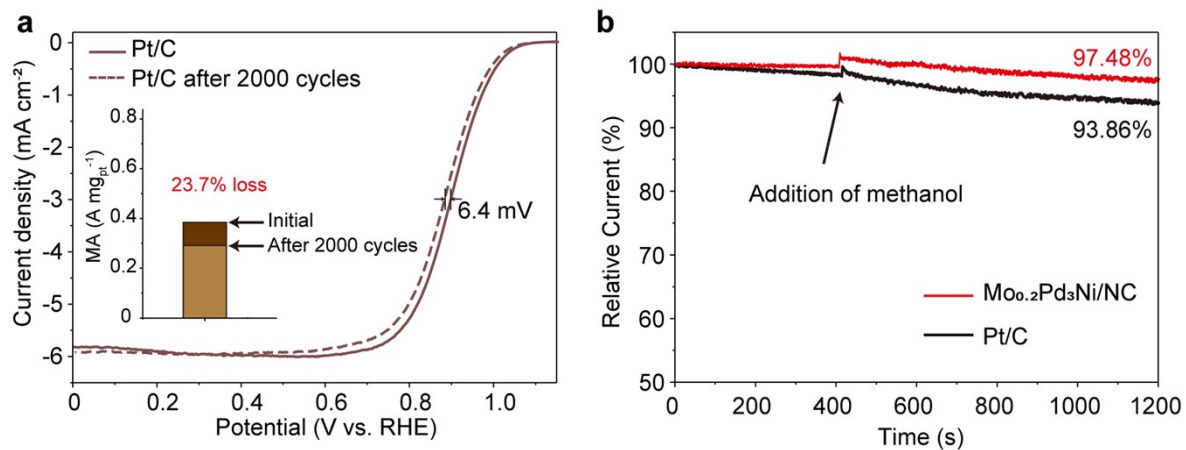

188

189 **Figure S11.** (a) ADT measurement, (b) methanol tolerance test of Mo<sub>0.2</sub>Pd<sub>3</sub>Ni/NC and Pt/C

190 in 0.1 M KOH solution.

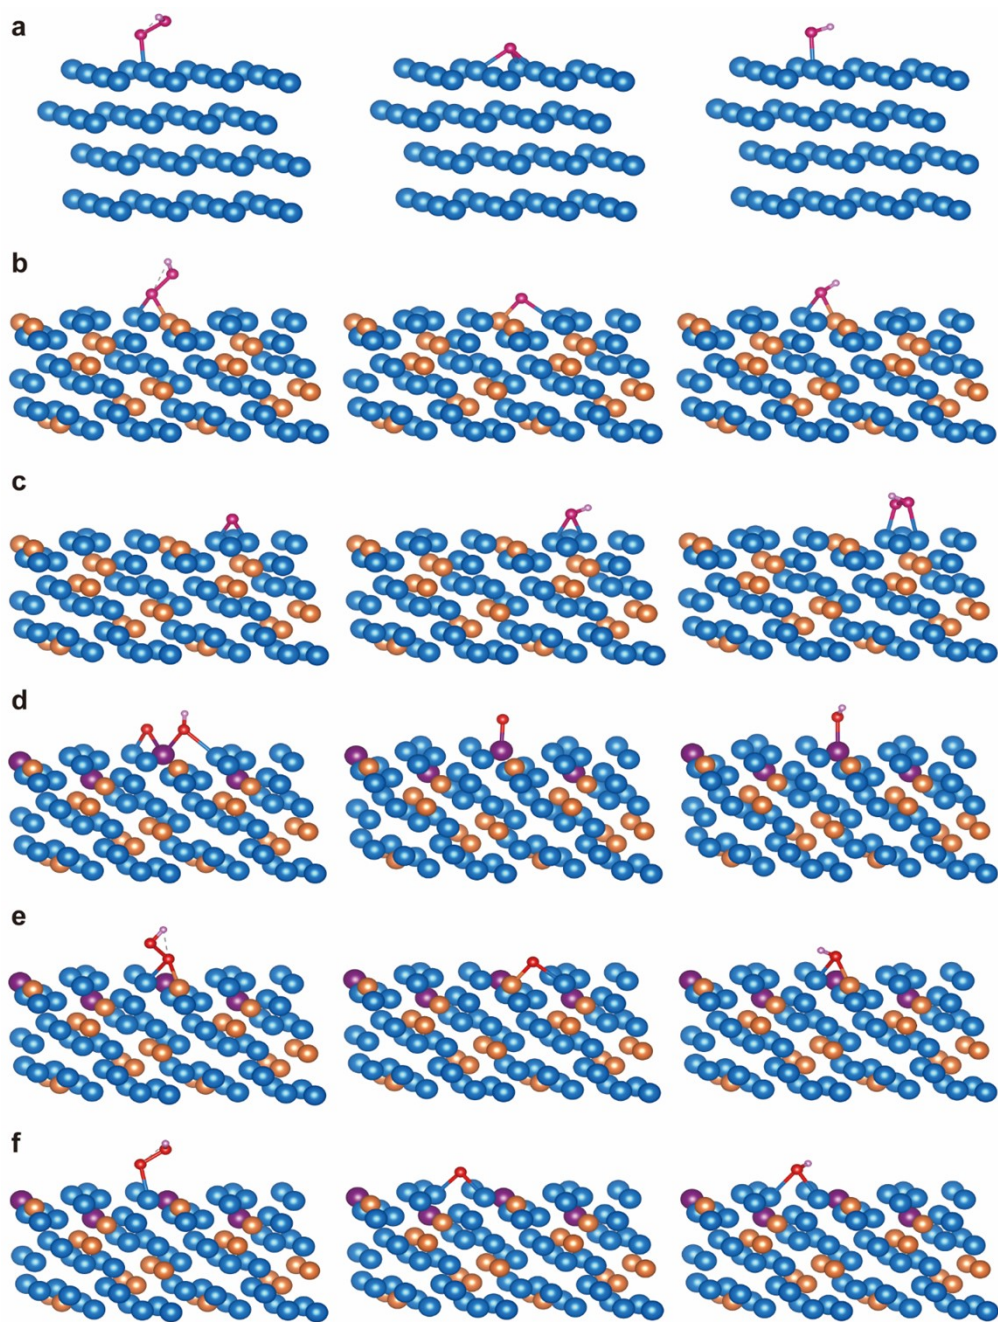

192

193 **Figure S12.** (a) Configurations of adsorbed intermediates on Pd (b) Configurations of  
 194 adsorbed intermediates on Pd<sub>3</sub>Ni active site 1 (c) Configurations of adsorbed intermediates on  
 195 Pd<sub>3</sub>Ni active site 2 (d) Configurations of adsorbed intermediates on Mo<sub>0.2</sub>Pd<sub>3</sub>Ni active site 1  
 196 (e) Configurations of adsorbed intermediates on Mo<sub>0.2</sub>Pd<sub>3</sub>Ni active site 3 (f) Configurations  
 197 of adsorbed intermediates on Mo<sub>0.2</sub>Pd<sub>3</sub>Ni active site 4.

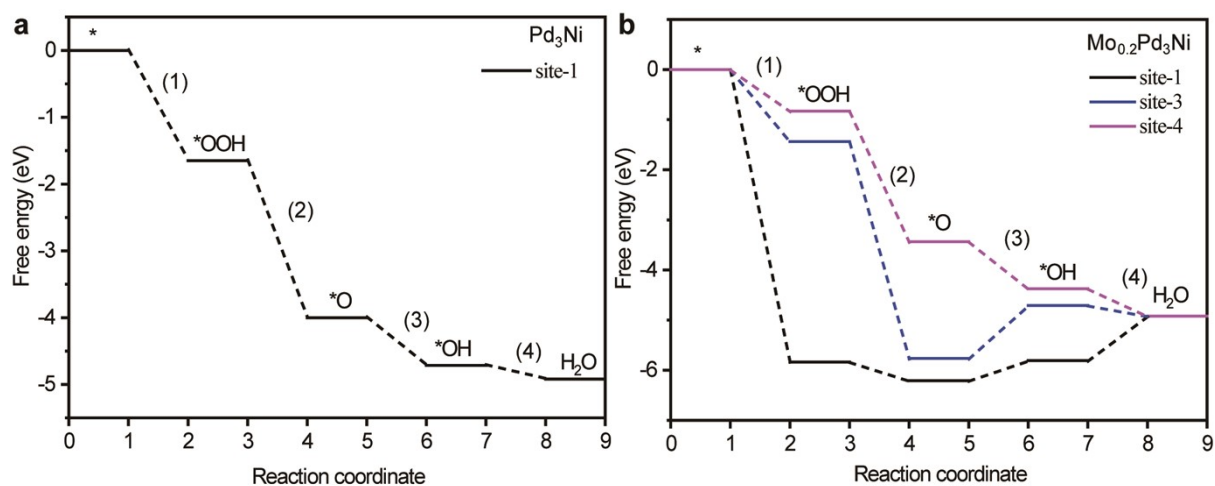

199

200 **Figure S13.** (a) Free energy diagrams of Pd<sub>3</sub>Ni active site-1. (b) Free energy diagrams of

201 Mo<sub>0.2</sub>Pd<sub>3</sub>Ni active site-1, site 3 and site-4.

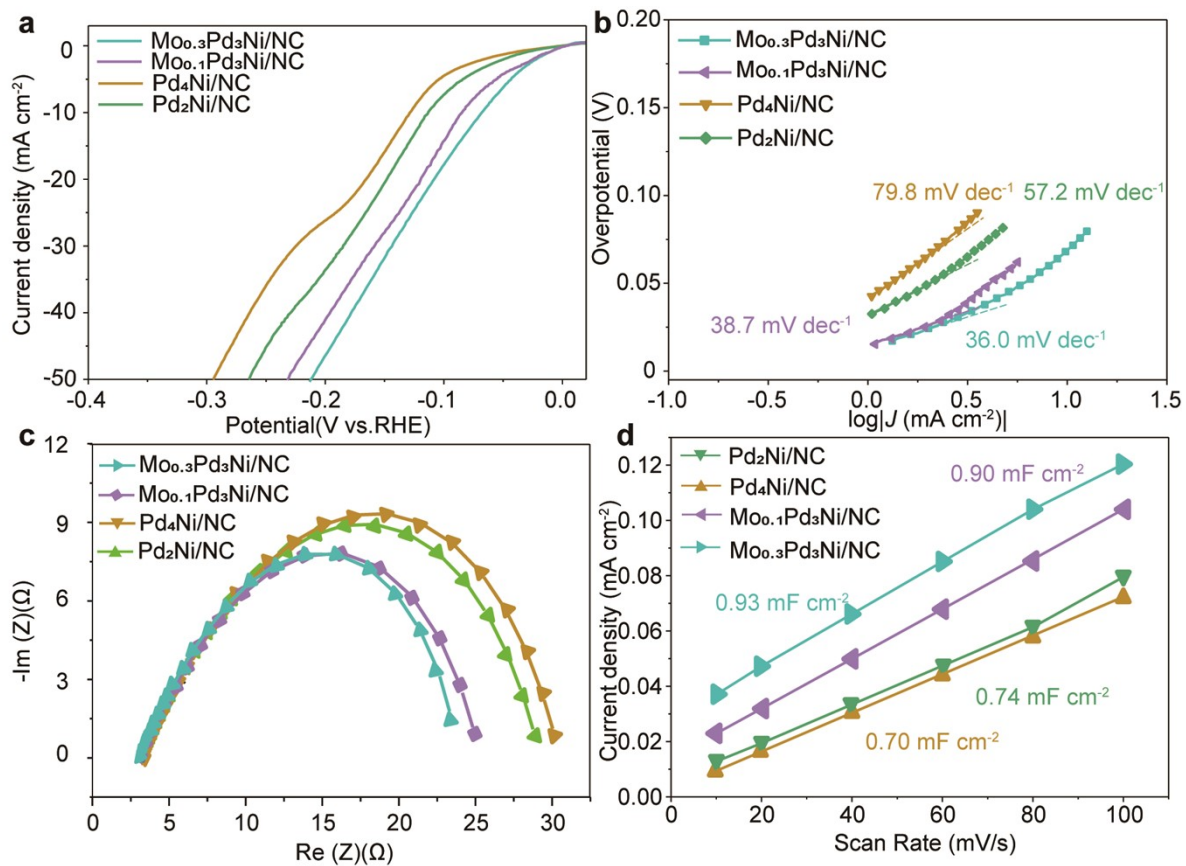

203

204 **Figure S14.** (a) LSV curves (b) The Tafel plots (c) EIS Nyquist plots (d)  $C_{dl}$  of Pd<sub>2</sub>Ni/NC,

205 Pd<sub>4</sub>Ni/NC, Mo<sub>0.1</sub>Pd<sub>3</sub>Ni/NC, and Mo<sub>0.3</sub>Pd<sub>3</sub>Ni/NC for HER in 0.5 M H<sub>2</sub>SO<sub>4</sub>.

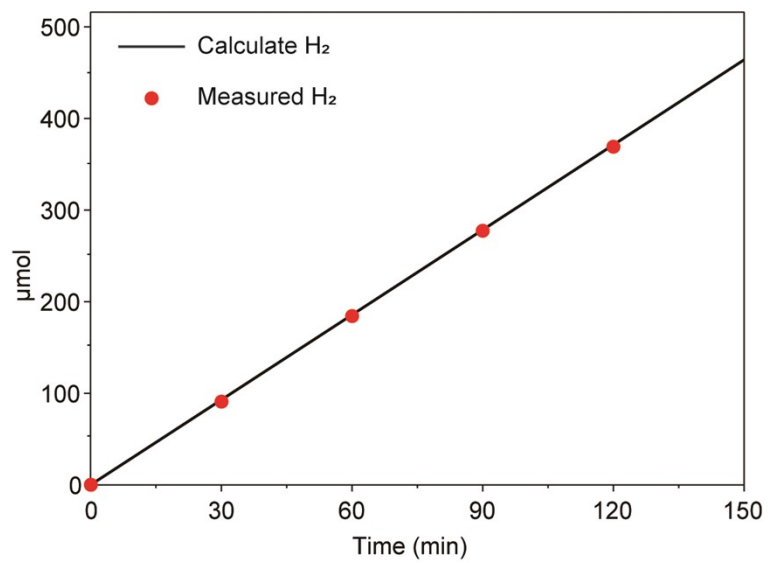

207

208 **Figure S15.** Hydrogen accumulation of Mo<sub>0.2</sub>Pd<sub>3</sub>Ni/NC in 0.5 M H<sub>2</sub>SO<sub>4</sub>.



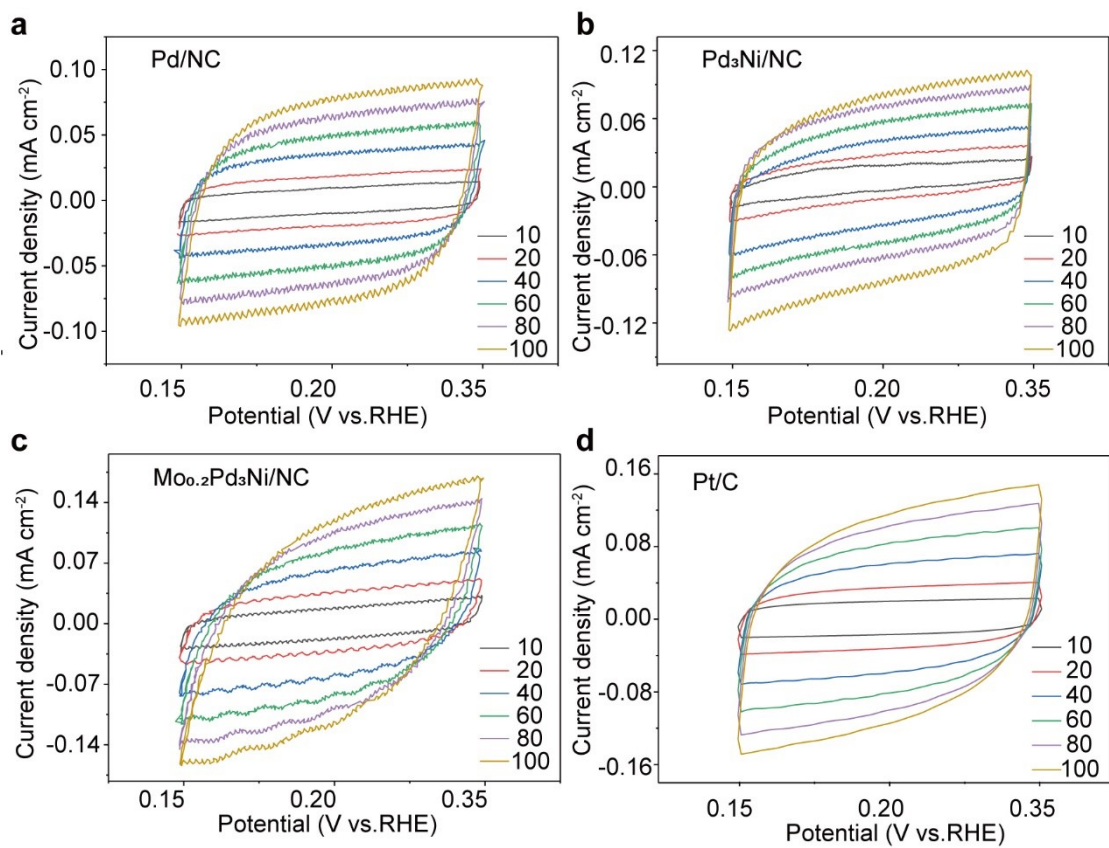

210

211 **Figure S16.** CV curves of the representative prepared catalysts and Pt/C in 0.5 M H<sub>2</sub>SO<sub>4</sub>.



**Table S8** Comparison of HER performance in acid media from previous reports

| Catalysts                                       | Overpotentials<br>at 10 mA cm <sup>-2</sup> | Tafel slop<br>(mV dec <sup>-1</sup> ) | Media                                   | Reference                                                               |
|-------------------------------------------------|---------------------------------------------|---------------------------------------|-----------------------------------------|-------------------------------------------------------------------------|
| Mo <sub>0.2</sub> Pd <sub>3</sub> Ni@NC         | 53                                          | 35.8                                  | 0.5 M<br>H <sub>2</sub> SO <sub>4</sub> | This work                                                               |
| Cu-Pd-S                                         | 52                                          | 39                                    | 0.5 M<br>H <sub>2</sub> SO <sub>4</sub> | <i>Advanced Fiber<br/>Materials</i> , <b>2021</b> ,<br>3: 117-127.      |
| Pd <sub>2</sub> Te NWs/rGO                      | 48                                          | 63                                    | 0.5 M<br>H <sub>2</sub> SO <sub>4</sub> | <i>Nanoscale</i> ,<br><b>2015</b> , 7, 18441-<br>18845.                 |
| PdCu <sub>1.3</sub> alloy<br>nanoparticles      | 50                                          | 34                                    | 0.5 M<br>H <sub>2</sub> SO <sub>4</sub> | <i>ACS Catal</i> ,<br><b>2016</b> , 6, 1929.                            |
| Pd<br>nanoparticle-graph<br>itic carbon nitride | 53                                          | 35                                    | 0.5 M<br>H <sub>2</sub> SO <sub>4</sub> | <i>ACS App. Mater.<br/>Interfaces</i> , <b>2016</b> ,<br>8, 13378.      |
| PdCu@Pd NCs                                     | 65                                          | 35                                    | 0.5 M<br>H <sub>2</sub> SO <sub>4</sub> | <i>ACS Appl.<br/>Mater.<br/>Interfaces</i> , <b>2017</b> ,<br>499, 128. |
| Pd-c-NiCo-PBA-C                                 | 147                                         | 67                                    | 0.5 M<br>H <sub>2</sub> SO <sub>4</sub> | <i>Adv. Funct.<br/>Mater</i> , <b>2021</b> , 31:<br>2008989.            |

216

**Reference:**

217 1 S. Treimer, A. Tang, D.C. Johnson, *Electroanalysis*, 2002, **14**, 165-171.

218 2 L. Zhu, C. Ma, Z. Wang, X. Gong, L. Cao, J. Yang, *Applied Surface Science*, 2022, **576**,  
219 151840.

220 3 G. Kresse, J. Furthmüller, Efficient iterative schemes for ab initio total-energy calculations  
221 using a plane-wave basis set, *Physical Review B*, 1996, **54**, 11169-11186.

222 4 J.P. Perdew, K. Burke, M. Ernzerhof, *Physical Review Letters*, 1996, 77, 3865-3868.

223 5 G. Kresse, D. Joubert, *Physical Review B*, 1999, **59**, 1758-1775.

224 6 P.E. Blöchl, *Physical Review B*, 1994, **50**, 17953-17979.

225 7 L. Gong, D. Zhang, C.-Y. Lin, Y. Zhu, Y. Shen, J. Zhang, X. Han, L. Zhang, Z. Xia,  
226 *Advanced Energy Materials*, 2019, **9**, 1902625.
